# Supplementary material for: Development and Psychometric Properties of the Sussex-Oxford Compassion Scales (SOCS)
Source: PubMed Central journal article supplement (PMC6906538; doi:10.1177/1073191119860911), 2019-07-29
Supplement: Supplementary_materials_(clean)_r1.pdf [file Supplementary_materials_%28clean%29_r1.pdf]

**Supplementary Materials for:****Development and Psychometric Properties of the Sussex-Oxford Compassion Scales (SOCS)**

Table S1

*Standardised loadings of compassion for others items on each factor in a sample of 932 healthcare staff (Stage 2)*

|                                                                                                  | Standardised loading | SE   |
|--------------------------------------------------------------------------------------------------|----------------------|------|
| <b>Recognising suffering</b>                                                                     |                      |      |
| *I notice when others are feeling distressed.                                                    | 0.826                | 0.02 |
| *I recognise when other people are feeling distressed without them having to tell me.            | 0.799                | 0.02 |
| *I recognise signs of suffering in others.                                                       | 0.797                | 0.02 |
| *I'm quick to notice early signs of distress in others.                                          | 0.780                | 0.02 |
| Even if I'm busy, I can still tell when other people are upset.                                  | 0.770                | 0.02 |
| I can tell when someone else is holding back tears.                                              | 0.696                | 0.02 |
| I recognise when other people first start feeling upset.                                         | 0.689                | 0.03 |
| I can tell when someone else is pretending to be fine when they're not.                          | 0.672                | 0.02 |
| I'm better than most people at recognising when others are struggling emotionally.               | 0.647                | 0.03 |
| It takes me a while to notice if someone is upset about something. (negatively phrased)          | 0.498                | 0.04 |
| I misjudge how others are feeling. (negatively phrased)                                          | 0.489                | 0.03 |
| I'm unaware of other people's distress. (negatively phrased)                                     | 0.173                | 0.04 |
| <b>Understanding the universality of suffering</b>                                               |                      |      |
| *I understand that everyone experiences suffering at some point in their lives.                  | 0.872                | 0.01 |
| *I understand that feeling upset at times is part of human nature.                               | 0.851                | 0.02 |
| *Like me, I know that other people also experience struggles in life.                            | 0.811                | 0.02 |
| *I know that we can all feel upset at times when we are wronged.                                 | 0.794                | 0.02 |
| I believe that feeling low at times is part of being human.                                      | 0.772                | 0.02 |
| I know that we can all feel distressed when things don't go well in our lives.                   | 0.768                | 0.02 |
| I understand that experiences of suffering are shared by everybody.                              | 0.754                | 0.02 |
| I know that everyone has ups and downs in their lives.                                           | 0.673                | 0.03 |
| I believe that no matter how different people are, we all experience difficulties in life.       | 0.672                | 0.03 |
| I know that I'm not alone in experiencing suffering.                                             | 0.641                | 0.03 |
| I believe that suffering is a shared human experience.                                           | 0.608                | 0.02 |
| When someone else is going through a hard time, I can understand and relate to their experience. | 0.355                | 0.03 |
| <b>Feeling for the person suffering</b>                                                          |                      |      |
| *When someone is going through a difficult time, I feel kindly towards them.                     | 0.769                | 0.02 |

|                                                                                                                     |       |      |
|---------------------------------------------------------------------------------------------------------------------|-------|------|
| *When I hear about bad things happening to other people, I feel concern for their wellbeing.                        | 0.707 | 0.03 |
| *When someone is upset, I try to tune in to how they're feeling.                                                    | 0.688 | 0.02 |
| *I'm sensitive to other people's distress.                                                                          | 0.682 | 0.03 |
| Even if I don't like someone, I can feel warmly towards them when they're in distress.                              | 0.638 | 0.03 |
| I'm emotionally distant from others when they're upset. (negatively phrased)                                        | 0.557 | 0.03 |
| I feel indifferent towards other people's struggles. (negatively phrased)                                           | 0.512 | 0.04 |
| I feel emotionally detached from other people's problems. (negatively phrased)                                      | 0.472 | 0.04 |
| <b>Tolerating uncomfortable feelings</b>                                                                            |       |      |
| *When someone else is upset, I try to stay open to their feelings rather than avoid them.                           | 0.750 | 0.03 |
| *I stay with and listen to other people when they're upset even if it's hard to bear.                               | 0.707 | 0.03 |
| *I connect with the suffering of others without judging them.                                                       | 0.621 | 0.04 |
| *When someone else is upset, I can be there for them without feeling overwhelmed by their distress.                 | 0.437 | 0.06 |
| I can stay with uncomfortable feelings in response to other people's distress.                                      | 0.383 | 0.04 |
| I connect with other people's distress without letting it overwhelm me.                                             | 0.378 | 0.06 |
| I can be around someone who is upset without letting their distress take over me.                                   | 0.367 | 0.06 |
| When others are upset, I feel so uncomfortable that I'm unable to be around them. (negatively phrased)              | 0.343 | 0.04 |
| I feel overwhelmed by other people's problems. (negatively phrased)                                                 | 0.204 | 0.05 |
| If I feel uncomfortable in response to someone else's distress, I don't let myself get carried away by my feelings. | 0.204 | 0.05 |
| <b>Acting or being motivated to act to alleviate suffering</b>                                                      |       |      |
| *When others are struggling, I try to do things that would be helpful.                                              | 0.823 | 0.02 |
| *When someone is going through a difficult time, I try to look after them.                                          | 0.815 | 0.02 |
| *When I see someone in need, I try to do what's best for them.                                                      | 0.806 | 0.02 |
| *When I see that someone is upset, I do my best to take care of them.                                               | 0.805 | 0.02 |
| If someone is suffering, I try to do something helpful to reduce their distress.                                    | 0.800 | 0.02 |
| I try to help people feel better when they are distressed, even if I can't do anything about the problem.           | 0.790 | 0.02 |
| When someone is going through a hard time, I try to do what's best for them.                                        | 0.726 | 0.02 |
| I try to prioritise the needs of others when they're facing difficulties.                                           | 0.690 | 0.02 |
| When others are feeling down, I think of ways I can make things better for them.                                    | 0.685 | 0.02 |
| I think of useful ways I can help people when they're struggling.                                                   | 0.664 | 0.03 |
| If someone looks troubled, I stop and ask if there's anything I can do.                                             | 0.622 | 0.02 |
| I'm drawn to helping those in need.                                                                                 | 0.597 | 0.03 |
| I'm dismissive of other people's difficulties and problems. (negatively phrased)                                    | 0.487 | 0.04 |

---

---

|                                                                                                                    |       |      |
|--------------------------------------------------------------------------------------------------------------------|-------|------|
| I go easy on other people when they're feeling upset.                                                              | 0.466 | 0.04 |
| When others are going through a difficult time, I leave them to deal with their own problems. (negatively phrased) | 0.431 | 0.04 |

---

*Note.* Items preceded by an asterisk indicate ones which were selected for inclusion in the SOCS-O. All standardised loadings were significant ( $p < .001$ ). Standardised loadings are reported to three decimal places to facilitate selection of the highest loading items.

Table S2

*Standardised loadings of compassion for the self items on each factor in a sample of 947 healthcare staff (Stage 2)*

|                                                                                                           | Standardised loading | SE   |
|-----------------------------------------------------------------------------------------------------------|----------------------|------|
| <b>Recognising suffering</b>                                                                              |                      |      |
| *I'm quick to notice early signs of distress in myself.                                                   | 0.833                | 0.01 |
| *I notice when I'm feeling distressed.                                                                    | 0.833                | 0.01 |
| *I'm good at recognising when I'm feeling distressed.                                                     | 0.778                | 0.02 |
| *I recognise signs of suffering in myself.                                                                | 0.773                | 0.02 |
| Even if I'm busy, I can still tell when I'm upset.                                                        | 0.713                | 0.02 |
| Compared to most people, I'm better at recognising when I'm struggling emotionally.                       | 0.657                | 0.02 |
| I recognise when I first start feeling upset.                                                             | 0.656                | 0.02 |
| It takes me a while to notice if I'm upset about something. (negatively phrased)                          | 0.510                | 0.03 |
| I can tell when I'm holding back tears.                                                                   | 0.504                | 0.03 |
| I can tell when I'm pretending to be fine when I'm not.                                                   | 0.488                | 0.03 |
| I'm unaware of my own distress. (negatively phrased)                                                      | 0.377                | 0.04 |
| <b>Understanding the universality of suffering</b>                                                        |                      |      |
| *I understand that everyone experiences suffering at some point in their lives.                           | 0.873                | 0.02 |
| *Like me, I know that other people also experience struggles in life.                                     | 0.858                | 0.01 |
| *I understand that feeling upset at times is part of human nature.                                        | 0.842                | 0.02 |
| *I know that we can all feel distressed when things don't go well in our lives.                           | 0.802                | 0.02 |
| I understand that experiences of suffering are shared by everybody.                                       | 0.802                | 0.03 |
| I know that we can all feel upset at times when we are wronged.                                           | 0.790                | 0.02 |
| I know that everyone has ups and downs in their lives.                                                    | 0.735                | 0.02 |
| I believe that feeling low at times is part of being human.                                               | 0.734                | 0.02 |
| I believe that no matter how different people are, we all experience difficulties in life.                | 0.678                | 0.03 |
| I believe that suffering is a shared human experience.                                                    | 0.641                | 0.02 |
| I know that I'm not alone in experiencing suffering.                                                      | 0.615                | 0.03 |
| When I'm going through a hard time, I take comfort in knowing that we all go through similar experiences. | 0.388                | 0.03 |
| <b>Feeling for the person suffering</b>                                                                   |                      |      |
| *When I'm going through a difficult time, I feel kindly towards myself.                                   | 0.859                | 0.01 |
| *When bad things happen to me, I feel caring towards myself.                                              | 0.818                | 0.02 |
| *Even when I'm disappointed with myself, I can feel warmly towards myself when I'm in distress.           | 0.783                | 0.02 |
| *When I'm upset, I try to tune in to how I'm feeling.                                                     | 0.652                | 0.03 |

|                                                                                                             |       |      |
|-------------------------------------------------------------------------------------------------------------|-------|------|
| I'm sensitive to my own distress.                                                                           | 0.510 | 0.04 |
| I feel indifferent towards my own struggles. (negatively phrased)                                           | 0.402 | 0.04 |
| I block out my feelings when I'm upset. (negatively phrased)                                                | 0.375 | 0.04 |
| I feel emotionally detached from my own problems. (negatively phrased)                                      | 0.204 | 0.04 |
| <b>Tolerating uncomfortable feelings</b>                                                                    |       |      |
| *When I'm upset, I try to stay open to my feelings rather than avoid them.                                  | 0.718 | 0.03 |
| *I connect with my own suffering without judging myself.                                                    | 0.716 | 0.02 |
| *When I'm upset, I can let the emotions be there without feeling overwhelmed.                               | 0.687 | 0.03 |
| *I connect with my own distress without letting it overwhelm me.                                            | 0.684 | 0.03 |
| I face my own feelings when I'm upset even if it's hard to bear.                                            | 0.668 | 0.03 |
| I can be upset without letting my feelings take over me.                                                    | 0.651 | 0.03 |
| I'm able to tolerate uncomfortable feelings when I'm distressed.                                            | 0.608 | 0.03 |
| I feel overwhelmed by my own problems. (negatively phrased)                                                 | 0.601 | 0.03 |
| When I'm in distress, I allow myself to experience the emotions as they are, even if they're uncomfortable. | 0.589 | 0.03 |
| When I'm upset, I feel so uncomfortable that I push the feelings away. (negatively phrased)                 | 0.539 | 0.03 |
| I'm judgemental of myself when I'm going through a hard time. (negatively phrased)                          | 0.487 | 0.04 |
| I overreact to my own problems. (negatively phrased)                                                        | 0.486 | 0.03 |
| <b>Acting or being motivated to act to alleviate suffering</b>                                              |       |      |
| *When I'm upset, I try to do what's best for myself.                                                        | 0.867 | 0.01 |
| *When I'm going through a difficult time, I try to look after myself.                                       | 0.866 | 0.01 |
| *I try to make myself feel better when I'm distressed, even if I can't do anything about the cause.         | 0.848 | 0.01 |
| *When I'm upset, I do my best to take care of myself.                                                       | 0.846 | 0.01 |
| When I'm struggling, I try to do things that would be helpful.                                              | 0.837 | 0.01 |
| When I'm going through a hard time, I try to do what's best for myself.                                     | 0.799 | 0.02 |
| If I'm suffering, I try to do something helpful to reduce my distress.                                      | 0.787 | 0.02 |
| I feel a desire to help myself when I'm in need.                                                            | 0.783 | 0.02 |
| When I feel troubled, I stop to ask myself what I could do that might help.                                 | 0.732 | 0.02 |
| I go easy on myself when I'm feeling upset.                                                                 | 0.712 | 0.02 |
| I think of useful ways I can help myself when I'm struggling.                                               | 0.707 | 0.02 |
| I try to prioritise my own needs when I'm facing difficulties.                                              | 0.692 | 0.02 |
| When I'm feeling down, I think of ways I can make things better for myself.                                 | 0.634 | 0.03 |
| When I'm going through a difficult time, I can be hard on myself. (negatively phrased)                      | 0.516 | 0.03 |
| I'm dismissive of my own difficulties and problems. (negatively phrased)                                    | 0.490 | 0.03 |

---

*Note.* Items preceded by an asterisk indicate ones which were selected for inclusion in the SOCS-S. All standardised loadings were significant ( $p < .001$ ). Standardised loadings are reported to three decimal places to facilitate selection of the highest loading items.

Table S3

*Standardised item loadings for the compassion for others five-factor hierarchical model in both validation samples (Stages 3 and 4)*

|                                                                                                    | 1,242 healthcare staff (Stage 3) | 371 students (Stage 4) |
|----------------------------------------------------------------------------------------------------|----------------------------------|------------------------|
| <b>Recognising suffering</b>                                                                       |                                  |                        |
| I notice when others are feeling distressed.                                                       | 0.88 (0.01)**                    | 0.83 (0.02)**          |
| I recognise when other people are feeling distressed without them having to tell me.               | 0.78 (0.02)**                    | 0.76 (0.04)**          |
| I recognise signs of suffering in others.                                                          | 0.82 (0.01)**                    | 0.70 (0.04)**          |
| I'm quick to notice early signs of distress in others.                                             | 0.83 (0.01)**                    | 0.82 (0.02)**          |
| <b>Understanding the universality of suffering</b>                                                 |                                  |                        |
| I understand that everyone experiences suffering at some point in their lives.                     | 0.90 (0.01)**                    | 0.84 (0.03)**          |
| I understand that feeling upset at times is part of human nature.                                  | 0.89 (0.01)**                    | 0.86 (0.03)**          |
| Like me, I know that other people also experience struggles in life.                               | 0.85 (0.02)**                    | 0.81 (0.04)**          |
| I know that we can all feel upset at times when we are wronged.                                    | 0.81 (0.02)**                    | 0.77 (0.04)**          |
| <b>Feeling for the person suffering</b>                                                            |                                  |                        |
| When someone is going through a difficult time, I feel kindly towards them.                        | 0.72 (0.14)**                    | 0.66 (0.06)**          |
| When I hear about bad things happening to other people, I feel concern for their wellbeing.        | 0.70 (0.02)**                    | 0.58 (0.05)**          |
| When someone is upset, I try to tune in to how they're feeling.                                    | 0.69 (0.02)**                    | 0.69 (0.03)**          |
| I'm sensitive to other people's distress.                                                          | 0.73 (0.02)**                    | 0.60 (0.05)**          |
| <b>Tolerating uncomfortable feelings</b>                                                           |                                  |                        |
| When someone else is upset, I try to stay open to their feelings rather than avoid them.           | 0.77 (0.02)**                    | 0.75 (0.04)**          |
| I stay with and listen to other people when they're upset even if it's hard to bear.               | 0.72 (0.02)**                    | 0.70 (0.04)**          |
| I connect with the suffering of others without judging them.                                       | 0.71 (0.02)**                    | 0.56 (0.06)**          |
| When someone else is upset, I can be there for them without feeling overwhelmed by their distress. | 0.42 (0.03)**                    | 0.17 (0.06)*           |
| <b>Acting or being motivated to act to alleviate suffering</b>                                     |                                  |                        |
| When others are struggling, I try to do things that would be helpful.                              | 0.84 (0.02)**                    | 0.76 (0.03)**          |
| When someone is going through a difficult time, I try to look after them.                          | 0.87 (0.01)**                    | 0.82 (0.03)**          |
| When I see someone in need, I try to do what's best for them.                                      | 0.83 (0.01)**                    | 0.76 (0.03)**          |
| When I see that someone is upset, I do my best to take care of them.                               | 0.82 (0.01)**                    | 0.75 (0.03)**          |

Standard errors are given in parentheses. \*\*  $p < .001$ , \*  $p < .01$ .

Table S4

*Standardised loadings of factors to an overall compassion factor in the five-factor hierarchical model in both validation samples (Stages 3 and 4)*

|                                                         | Compassion for others            |                        | Compassion for the self          |                        |
|---------------------------------------------------------|----------------------------------|------------------------|----------------------------------|------------------------|
|                                                         | 1,242 healthcare staff (Stage 3) | 371 students (Stage 4) | 1,216 healthcare staff (Stage 3) | 371 students (Stage 4) |
| Recognising suffering                                   | 0.78 (0.02)*                     | 0.62 (0.05)*           | 0.59 (0.03)*                     | 0.33 (0.06)*           |
| Understanding the universality of suffering             | 0.58 (0.03)*                     | 0.42 (0.06)*           | 0.34 (0.03)*                     | 0.26 (0.05)*           |
| Feeling for the person suffering                        | 0.98 (0.01)*                     | 0.92 (0.04)*           | 0.99 (0.01)*                     | 0.98 (0.02)*           |
| Tolerating uncomfortable feelings                       | 0.93 (0.02)*                     | 0.91 (0.03)*           | 0.94 (0.01)*                     | 0.87 (0.03)*           |
| Acting or being motivated to act to alleviate suffering | 0.92 (0.01)*                     | 0.95 (0.03)*           | 0.94 (0.01)*                     | 0.94 (0.02)*           |

Standard errors are given in parentheses. \*  $p < .001$ .



Table S5

*Correlation coefficients between total scale and subscale scores on the SOCS-O and SOCS-S using available data from 1,319 healthcare staff (Stage 3)*

|                                                                         | SOCS-O | 1    | 2    | 3    | 4    | 5    | SOCS-S | 6    | 7    | 8    | 9    | 10 |
|-------------------------------------------------------------------------|--------|------|------|------|------|------|--------|------|------|------|------|----|
| <b>Sussex-Oxford<br/>Compassion for<br/>Others Scale<br/>(SOCS-O)</b>   | -      |      |      |      |      |      |        |      |      |      |      |    |
| 1. Recognising<br>suffering                                             | .80*   | -    |      |      |      |      |        |      |      |      |      |    |
| 2. Understanding<br>the universality of<br>suffering                    | .70*   | .41* | -    |      |      |      |        |      |      |      |      |    |
| 3. Feeling for the<br>person suffering                                  | .88*   | .66* | .49* | -    |      |      |        |      |      |      |      |    |
| 4. Tolerating<br>uncomfortable<br>feelings                              | .84*   | .61* | .48* | .68* | -    |      |        |      |      |      |      |    |
| 5. Acting or being<br>motivated to act to<br>alleviate suffering        | .87*   | .64* | .47* | .77* | .71* | -    |        |      |      |      |      |    |
| <b>Sussex-Oxford<br/>Compassion for<br/>the Self Scale<br/>(SOCS-S)</b> | .40*   | .33* | .39* | .32* | .37* | .25* | -      |      |      |      |      |    |
| 6. Recognising<br>suffering                                             | .37*   | .36* | .33* | .30* | .31* | .25* | .74*   | -    |      |      |      |    |
| 7. Understanding<br>the universality of<br>suffering                    | .51*   | .27* | .78* | .36* | .36* | .32* | .55*   | .41* | -    |      |      |    |
| 8. Feeling for the<br>person suffering                                  | .25*   | .23* | .20* | .23* | .25* | .15* | .89*   | .52* | .30* | -    |      |    |
| 9. Tolerating<br>uncomfortable<br>feelings                              | .25*   | .22* | .17* | .19* | .32* | .15* | .83*   | .46* | .29* | .75* | -    |    |
| 10. Acting or<br>being motivated to<br>act to alleviate<br>suffering    | .23*   | .22* | .16* | .19* | .24* | .15* | .88*   | .52* | .28* | .84* | .72* | -  |

\* $p < .001$ .

Table S6

*Standardised item loadings for the compassion for the self five-factor hierarchical model in both validation samples (Stages 3 and 4)*

|                                                                                                    | 1,216 healthcare staff (Stage 3) | 371 students (Stage 4) |
|----------------------------------------------------------------------------------------------------|----------------------------------|------------------------|
| <b>Recognising suffering</b>                                                                       |                                  |                        |
| I'm quick to notice early signs of distress in myself.                                             | 0.85 (0.01)*                     | 0.80 (0.03)*           |
| I notice when I'm feeling distressed.                                                              | 0.81 (0.02)*                     | 0.81 (0.03)*           |
| I'm good at recognising when I'm feeling distressed.                                               | 0.80 (0.02)*                     | 0.77 (0.03)*           |
| I recognise signs of suffering in myself.                                                          | 0.76 (0.02)*                     | 0.69 (0.04)*           |
| <b>Understanding the universality of suffering</b>                                                 |                                  |                        |
| I understand that everyone experiences suffering at some point in their lives.                     | 0.88 (0.02)*                     | 0.91 (0.02)*           |
| Like me, I know that other people also experience struggles in life.                               | 0.86 (0.02)*                     | 0.87 (0.03)*           |
| I understand that feeling upset at times is part of human nature.                                  | 0.87 (0.02)*                     | 0.85 (0.03)*           |
| I know that we can all feel distressed when things don't go well in our lives.                     | 0.84 (0.02)*                     | 0.77 (0.04)*           |
| <b>Feeling for the person suffering</b>                                                            |                                  |                        |
| When I'm going through a difficult time, I feel kindly towards myself.                             | 0.85 (0.01)*                     | 0.87 (0.02)*           |
| When bad things happen to me, I feel caring towards myself.                                        | 0.79 (0.02)*                     | 0.87 (0.02)*           |
| Even when I'm disappointed with myself, I can feel warmly towards myself when I'm in distress.     | 0.77 (0.02)*                     | 0.76 (0.03)*           |
| When I'm upset, I try to tune in to how I'm feeling.                                               | 0.65 (0.02)*                     | 0.54 (0.05)*           |
| <b>Tolerating uncomfortable feelings</b>                                                           |                                  |                        |
| When I'm upset, I try to stay open to my feelings rather than avoid them.                          | 0.69 (0.02)*                     | 0.47 (0.06)*           |
| I connect with my own suffering without judging myself.                                            | 0.72 (0.02)*                     | 0.79 (0.03)*           |
| When I'm upset, I can let the emotions be there without feeling overwhelmed.                       | 0.57 (0.03)*                     | 0.63 (0.05)*           |
| I connect with my own distress without letting it overwhelm me.                                    | 0.61 (0.03)*                     | 0.65 (0.04)*           |
| <b>Acting or being motivated to act to alleviate suffering</b>                                     |                                  |                        |
| When I'm upset, I try to do what's best for myself.                                                | 0.86 (0.01)*                     | 0.83 (0.02)*           |
| When I'm going through a difficult time, I try to look after myself.                               | 0.91 (0.01)*                     | 0.87 (0.02)*           |
| I try to make myself feel better when I'm distressed, even if I can't do anything about the cause. | 0.76 (0.02)*                     | 0.80 (0.02)*           |
| When I'm upset, I do my best to take care of myself.                                               | 0.88 (0.01)*                     | 0.85 (0.02)*           |

Standard errors are given in parentheses. \*  $p < .001$ .

Table S7

Correlation coefficients between total scale and subscale scores on the SOCS-O and SOCS-S using available data from 371 students (Stage 4)

|                                                                         | SOCS-O | 1      | 2      | 3      | 4      | 5      | SOCS-S | 6      | 7      | 8      | 9      | 10 |
|-------------------------------------------------------------------------|--------|--------|--------|--------|--------|--------|--------|--------|--------|--------|--------|----|
| <b>Sussex-Oxford<br/>Compassion for<br/>Others Scale<br/>(SOCS-O)</b>   | -      |        |        |        |        |        |        |        |        |        |        |    |
| 1. Recognising suffering                                                | .72*** | -      |        |        |        |        |        |        |        |        |        |    |
| 2. Understanding the universality of suffering                          | .62*** | .25*** | -      |        |        |        |        |        |        |        |        |    |
| 3. Feeling for the person suffering                                     | .79*** | .47*** | .31*** | -      |        |        |        |        |        |        |        |    |
| 4. Tolerating uncomfortable feelings                                    | .77*** | .46*** | .37*** | .49*** | -      |        |        |        |        |        |        |    |
| 5. Acting or being motivated to act to alleviate suffering              | .83*** | .49*** | .32*** | .69*** | .61*** | -      |        |        |        |        |        |    |
| <b>Sussex-Oxford<br/>Compassion for<br/>the Self Scale<br/>(SOCS-S)</b> | .34*** | .14**  | .44*** | .18*** | .29*** | .19*** | -      |        |        |        |        |    |
| 6. Recognising suffering                                                | .32*** | .26*** | .29*** | .17**  | .22*** | .23*** | .58*** | -      |        |        |        |    |
| 7. Understanding the universality of suffering                          | .43*** | .13*   | .74*** | .20*** | .29*** | .22*** | .52*** | .32*** | -      |        |        |    |
| 8. Feeling for the person suffering                                     | .21*** | .08    | .25*** | .16**  | .18**  | .12*   | .87*** | .34*** | .22*** | -      |        |    |
| 9. Tolerating uncomfortable feelings                                    | .14**  | .05    | .19*** | .05    | .23*** | .01    | .79*** | .25*** | .20*** | .72*** | -      |    |
| 10. Acting or being motivated to act to alleviate suffering             | .17**  | .03    | .21*** | .10    | .18**  | .13*   | .86*** | .29*** | .24*** | .82*** | .67*** | -  |

\* $p < .05$ , \*\* $p < .01$ , \*\*\* $p < .001$

### Sussex-Oxford Compassion for Others Scale (SOCS-O)

#### Instructions

Below are statements describing how you might relate to **other people**. Please indicate how true the following statements are of you using the 5-point response scale (1 = Not at all true, 2 = Rarely true, 3 = Sometimes true, 4 = Often true, 5 = Always true). For example, if you think that a statement is often true of you, circle '4'.

Note: In the below items, generic terms (e.g., 'upset', 'distress', 'suffering', 'struggling') are used to cover a range of unpleasant emotions, such as sadness, fear, anger, frustration, guilt, shame, etc.

Please provide an answer for each statement.

|                                                                                                | Not at all true | Rarely true | Sometimes true | Often true | Always true |
|------------------------------------------------------------------------------------------------|-----------------|-------------|----------------|------------|-------------|
| 1. I recognise when other people are feeling distressed without them having to tell me.        | 1               | 2           | 3              | 4          | 5           |
| 2. I understand that everyone experiences suffering at some point in their lives.              | 1               | 2           | 3              | 4          | 5           |
| 3. When someone is going through a difficult time, I feel kindly towards them.                 | 1               | 2           | 3              | 4          | 5           |
| 4. When someone else is upset, I try to stay open to their feelings rather than avoid them.    | 1               | 2           | 3              | 4          | 5           |
| 5. When others are struggling, I try to do things that would be helpful.                       | 1               | 2           | 3              | 4          | 5           |
| 6. I notice when others are feeling distressed.                                                | 1               | 2           | 3              | 4          | 5           |
| 7. I understand that feeling upset at times is part of human nature.                           | 1               | 2           | 3              | 4          | 5           |
| 8. When I hear about bad things happening to other people, I feel concern for their wellbeing. | 1               | 2           | 3              | 4          | 5           |
| 9. I stay with and listen to other people when they're upset even if it's hard to bear.        | 1               | 2           | 3              | 4          | 5           |
| 10. When someone is going through a difficult time, I try to look after them.                  | 1               | 2           | 3              | 4          | 5           |
| 11. I'm quick to notice early signs of distress in others.                                     | 1               | 2           | 3              | 4          | 5           |
| 12. Like me, I know that other people also experience struggles in life.                       | 1               | 2           | 3              | 4          | 5           |

|                                                                                                        | Not at all true | Rarely true | Sometimes true | Often true | Always true |
|--------------------------------------------------------------------------------------------------------|-----------------|-------------|----------------|------------|-------------|
| 13. When someone is upset, I try to tune in to how they're feeling.                                    | 1               | 2           | 3              | 4          | 5           |
| 14. I connect with the suffering of others without judging them.                                       | 1               | 2           | 3              | 4          | 5           |
| 15. When I see someone in need, I try to do what's best for them.                                      | 1               | 2           | 3              | 4          | 5           |
| 16. I recognise signs of suffering in others.                                                          | 1               | 2           | 3              | 4          | 5           |
| 17. I know that we can all feel upset at times when we are wronged.                                    | 1               | 2           | 3              | 4          | 5           |
| 18. I'm sensitive to other people's distress.                                                          | 1               | 2           | 3              | 4          | 5           |
| 19. When someone else is upset, I can be there for them without feeling overwhelmed by their distress. | 1               | 2           | 3              | 4          | 5           |
| 20. When I see that someone is upset, I do my best to take care of them.                               | 1               | 2           | 3              | 4          | 5           |

### Scoring Information

Users may compute both total subscale scores and a total SOCS-O score. To compute total subscale scores, sum item scores within each subscale (see below for items associated with each subscale). To compute a total SOCS-O score, sum all five total subscale scores or sum all 20 item scores.

Recognising suffering items: 1, 6, 11, 16.

Understanding the universality of suffering items: 2, 7, 12, 17.

Feeling for the person suffering items: 3, 8, 13, 18.

Tolerating uncomfortable feelings items: 4, 9, 14, 19.

Acting or being motivated to act to alleviate suffering items: 5, 10, 15, 20.

### Sussex-Oxford Compassion for the Self Scale (SOCS-S)

#### Instructions

Below are statements describing how you might relate to **yourself**. Please indicate how true the following statements are of you using the 5-point response scale (1 = Not at all true, 2 = Rarely true, 3 = Sometimes true, 4 = Often true, 5 = Always true). For example, if you think that a statement is often true of you, circle '4'.

Note: In the below items, generic terms (e.g., 'upset', 'distress', 'suffering', 'struggling') are used to cover a range of unpleasant emotions, such as sadness, fear, anger, frustration, guilt, shame, etc.

Please provide an answer for each statement.

|                                                                                                       | Not at all true | Rarely true | Sometimes true | Often true | Always true |
|-------------------------------------------------------------------------------------------------------|-----------------|-------------|----------------|------------|-------------|
| 1. I'm good at recognising when I'm feeling distressed.                                               | 1               | 2           | 3              | 4          | 5           |
| 2. I understand that everyone experiences suffering at some point in their lives.                     | 1               | 2           | 3              | 4          | 5           |
| 3. When I'm going through a difficult time, I feel kindly towards myself.                             | 1               | 2           | 3              | 4          | 5           |
| 4. When I'm upset, I try to stay open to my feelings rather than avoid them.                          | 1               | 2           | 3              | 4          | 5           |
| 5. I try to make myself feel better when I'm distressed, even if I can't do anything about the cause. | 1               | 2           | 3              | 4          | 5           |
| 6. I notice when I'm feeling distressed.                                                              | 1               | 2           | 3              | 4          | 5           |
| 7. I understand that feeling upset at times is part of human nature.                                  | 1               | 2           | 3              | 4          | 5           |
| 8. When bad things happen to me, I feel caring towards myself.                                        | 1               | 2           | 3              | 4          | 5           |
| 9. I connect with my own distress without letting it overwhelm me.                                    | 1               | 2           | 3              | 4          | 5           |
| 10. When I'm going through a difficult time, I try to look after myself.                              | 1               | 2           | 3              | 4          | 5           |
| 11. I'm quick to notice early signs of distress in myself.                                            | 1               | 2           | 3              | 4          | 5           |
| 12. Like me, I know that other people also experience struggles in life.                              | 1               | 2           | 3              | 4          | 5           |

|                                                                                                    | Not at all true | Rarely true | Sometimes true | Often true | Always true |
|----------------------------------------------------------------------------------------------------|-----------------|-------------|----------------|------------|-------------|
| 13. When I'm upset, I try to tune in to how I'm feeling.                                           | 1               | 2           | 3              | 4          | 5           |
| 14. I connect with my own suffering without judging myself.                                        | 1               | 2           | 3              | 4          | 5           |
| 15. When I'm upset, I try to do what's best for myself.                                            | 1               | 2           | 3              | 4          | 5           |
| 16. I recognise signs of suffering in myself.                                                      | 1               | 2           | 3              | 4          | 5           |
| 17. I know that we can all feel distressed when things don't go well in our lives.                 | 1               | 2           | 3              | 4          | 5           |
| 18. Even when I'm disappointed with myself, I can feel warmly towards myself when I'm in distress. | 1               | 2           | 3              | 4          | 5           |
| 19. When I'm upset, I can let the emotions be there without feeling overwhelmed.                   | 1               | 2           | 3              | 4          | 5           |
| 20. When I'm upset, I do my best to take care of myself.                                           | 1               | 2           | 3              | 4          | 5           |

### Scoring Information

Users may compute both total subscale scores and a total SOCS-S score. To compute total subscale scores, sum item scores within each subscale (see below for items associated with each subscale). To compute a total SOCS-S score, sum all five total subscale scores or sum all 20 item scores.

Recognising suffering items: 1, 6, 11, 16.

Understanding the universality of suffering items: 2, 7, 12, 17.

Feeling for the person suffering items: 3, 8, 13, 18.

Tolerating uncomfortable feelings items: 4, 9, 14, 19.

Acting or being motivated to act to alleviate suffering items: 5, 10, 15, 20.
